# Supplementary material for: Matching an Old Marine Paradigm: Limitless Connectivity in a Deep-Water Fish over a Large Distance
Source: Animals (Basel). 2023 Aug 23;13(17):2691. doi: 10.3390/ani13172691 (PMC10486518; doi:10.3390/ani13172691)
Supplement: Supplementary file 1 [file animals-13-02691-s001.zip]

Archive with 10 entries (10 files):
- Figure S1.png
- Figure S2a.JPEG
- Figure S2b.JPEG
- Figure S3.JPEG
- Suppl Text S1_Pagellus_Ferrari et al_rev22-08-2023.pdf
- Table S1.xlsx
- Table S2.xlsx
- Table S3.xlsx
- Table S4.xlsx
- Table S5.xlsx
