# Supplementary material for: Matching an Old Marine Paradigm: Limitless Connectivity in a Deep-Water Fish over a Large Distance
Source: Animals (Basel). 2023 Aug 23;13(17):2691. doi: 10.3390/ani13172691 (PMC10486518; doi:10.3390/ani13172691)
Supplement: Supplementary file 1 [file animals-13-02691-s001.zip › Table S1.xlsx]

## Sheet: Table S1
N	Code	Date	Lenght (mm)	Weight (g)	Sex	Lat	Long	Control Point	Depth	Zone/locality
1	STD-#01	2018-11-19	358	649		43.5359	-3.81612	Verified		Santander
2	STD-#02	2018-11-19	350	679		43.5359	-3.81612	Verified		Santander
3	STD-#03	2018-11-19	364	755		43.5359	-3.81612	Verified		Santander
4	STD-#04	2018-11-19	359	717		43.5359	-3.81612	Verified		Santander
5	STD-#05	2018-11-19	369	737		43.5359	-3.81612	Verified		Santander
6	STD-#06	2018-11-19	360	748		43.5359	-3.81612	Verified		Santander
7	STD-#07	2018-11-19	359	725		43.5359	-3.81612	Verified		Santander
8	STD-#08	2018-11-19	358	670		43.5359	-3.81612	Verified		Santander
9	STD-#09	2018-11-19	357	696		43.5359	-3.81612	Verified		Santander
10	STD-#10	2018-11-19	357	716		43.5359	-3.81612	Verified		Santander
11	STD-#11	2018-11-19	353	654		43.5359	-3.81612	Verified		Santander
12	STD-#12	2018-11-19	368	702		43.5359	-3.81612	Verified		Santander
13	STD-#13	2018-11-19	348	660		43.5359	-3.81612	Verified		Santander
14	STD-#14	2018-11-23	348	630		43.5359	-3.81612	Verified		Santander
15	STD-#15	2018-11-23	332	573		43.5359	-3.81612	Verified		Santander
16	STD-#16	2018-11-23	346	594		43.5359	-3.81612	Verified		Santander
17	STD-#17	2018-11-23	339	565		43.5359	-3.81612	Verified		Santander
18	STD-#18	2018-11-23	329	567		43.5359	-3.81612	Verified		Santander
19	STD-#19	2018-11-23	333	504		43.5359	-3.81612	Verified		Santander
20	STD-#20	2018-11-23	361	677		43.5359	-3.81612	Verified		Santander
21	STD-#21	2018-11-23	326	554		43.5359	-3.81612	Verified		Santander
22	STD-#22	2018-11-23	332	533		43.5359	-3.81612	Verified		Santander
23	STD-#23	2018-11-23	330	507		43.5359	-3.81612	Verified		Santander
24	STD-#24	2018-11-23	326	535		43.5359	-3.81612	Verified		Santander
25	STD-#25	2018-11-23	343	618		43.5359	-3.81612	Verified		Santander
26	STD-#26	2018-11-23	347	638		43.5359	-3.81612	Verified		Santander
27	POR-#1	2019-01-16	337	531	F	39.4426	-9.94097	Not verified		Peniche
28	POR-#2	2019-01-16	339	561	F	39.4426	-9.94097	Not verified		Peniche
29	POR-#3	2019-01-16	336	676	M	39.4426	-9.94097	Not verified		Peniche
30	POR-#4	2019-01-16	327	531	F	39.4426	-9.94097	Not verified		Peniche
31	POR-#5	2019-01-16	317	446	F	39.4426	-9.94097	Not verified		Peniche
32	POR-#6	2019-01-16	337	616	F	39.4426	-9.94097	Not verified		Peniche
33	POR-#7	2019-01-16	315	443	H	39.4426	-9.94097	Not verified		Peniche
34	POR-#8	2019-01-16	349	601	F	39.4426	-9.94097	Not verified		Peniche
35	POR-#9	2019-01-16	326	499	H	39.4426	-9.94097	Not verified		Peniche
36	POR-#10	2019-01-16	333	562	F	39.4426	-9.94097	Not verified		Peniche
37	POR-#11	2019-01-16	336	523	F	39.4426	-9.94097	Not verified		Peniche
38	POR-#12	2019-01-16	326	451	H	39.4426	-9.94097	Not verified		Peniche
39	POR-#13	2019-01-16	320	499	F	39.4426	-9.94097	Not verified		Peniche
40	POR-#14	2019-01-16	330	546	H	39.4426	-9.94097	Not verified		Peniche
41	POR-#15	2019-01-16	342	567	F	39.4426	-9.94097	Not verified		Peniche
42	POR-#16	2019-01-16	344	633	M	39.4426	-9.94097	Not verified		Peniche
43	POR-#17	2019-01-16	341	611	F	39.4426	-9.94097	Not verified		Peniche
44	POR-#18	2019-01-16	348	610	F	39.4426	-9.94097	Not verified		Peniche
45	POR-#19	2019-01-28	320	479	F	39.4426	-9.94097	Not verified		Peniche
46	POR-#20	2019-01-28	305	461	F	39.4426	-9.94097	Not verified		Peniche
47	POR-#21	2019-01-28	300	369	F	39.4426	-9.94097	Not verified		Peniche
48	POR-#22	2019-02-26	332	582	F	39.4426	-9.94097	Not verified		Peniche
49	POR-#23	2019-02-26	330	508	F	39.4426	-9.94097	Not verified		Peniche
50	POR-#24	2019-02-26	337	524	M	39.4426	-9.94097	Not verified		Peniche
51	POR-#25	2019-02-26	340	564	F	39.4426	-9.94097	Not verified		Peniche
52	POR-#26	2019-02-26	346	587	F	39.4426	-9.94097	Not verified		Peniche
53	POR-#27	2019-02-26	333	525	F	39.4426	-9.94097	Not verified		Peniche
54	POR-#28	2019-02-26	336	549	M	39.4426	-9.94097	Not verified		Peniche
55	POR-#29	2019-02-26	343	603	F	39.4426	-9.94097	Not verified		Peniche
56	POR-#30	2019-02-26	327	523	H	39.4426	-9.94097	Not verified		Peniche
57	POR-#31	2019-02-26	335	549	F	39.4426	-9.94097	Not verified		Peniche
58	POR-#32	2019-02-26	349	588	F	39.4426	-9.94097	Not verified		Peniche
59	POR-#33	2019-02-26	347	657	M	39.4426	-9.94097	Not verified		Peniche
60	POR-#34	2019-02-26	340	547	M	39.4426	-9.94097	Not verified		Peniche
61	POR-#35	2019-02-26	341	526	H	39.4426	-9.94097	Not verified		Peniche
62	POR-#36	2019-02-26	341	561	M	39.4426	-9.94097	Not verified		Peniche
63	COL #1	2018-07-02	322	476	M	35.9723	-5.60633	Not verified		Tarifa
64	COL #2	2018-07-02	313	498	F	35.9723	-5.60633	Not verified		Tarifa
65	COL #3	2018-07-02	328	532	M	35.9723	-5.60633	Not verified		Tarifa
66	COL #4	2018-07-02	323	511	M	36.2493	-6.18322	Not verified		Conil
67	COL #5	2018-07-02	303	446	F	36.2493	-6.18322	Not verified		Conil
68	COL #6	2018-07-02	330	514	F	36.2493	-6.18322	Not verified		Conil
69	COL #7	2018-07-02	329	531	F	36.2493	-6.18322	Not verified		Conil
70	COL #8	2018-07-02	333	498	M	36.2493	-6.18322	Not verified		Conil
71	COL #9	2018-07-02	324	490	F	36.2493	-6.18322	Not verified		Conil
72	COL #10	2018-07-02	332	524	F	36.2493	-6.18322	Not verified		Conil
73	COL #11	2018-07-02	333	410	F	36.2493	-6.18322	Not verified		Conil
74	COL #12	2018-07-02	330	521	F	36.2493	-6.18322	Not verified		Conil
75	COL #13	2018-07-02	318	450	F	36.2493	-6.18322	Not verified		Conil
76	COL #14	2018-07-02	328	519	F	36.2493	-6.18322	Not verified		Conil
77	COL #15	2018-07-02	333	506	F	36.2493	-6.18322	Not verified		Conil
78	COL #16	2018-07-02	311	456	F	36.2493	-6.18322	Not verified		Conil
79	COL #17	2018-07-02	330	421	F	36.2493	-6.18322	Not verified		Conil
80	COL #18	2018-07-02	302	463	M	36.2493	-6.18322	Not verified		Conil
81	KSR #1	2018-06-25	370	852	HF	35.9063	-5.56361	Verified		Ksar Sghir
82	KSR #2	2018-06-25	330	532	H	35.9063	-5.56361	Verified		Ksar Sghir
83	KSR #3	2018-06-25	335	630	H	35.9063	-5.56361	Verified		Ksar Sghir
84	KSR #4	2018-06-25	330	550	HF	35.9063	-5.56361	Verified		Ksar Sghir
85	KSR #5	2018-06-25	340	590	F	35.9063	-5.56361	Verified		Ksar Sghir
86	KSR #6	2018-06-25	330	594	H	35.9063	-5.56361	Verified		Ksar Sghir
87	KSR #7	2018-06-25	337	570	H	35.9063	-5.56361	Verified		Ksar Sghir
88	KSR #8	2018-06-25	334	588	H	35.9063	-5.56361	Verified		Ksar Sghir
89	KSR #9	2018-06-25	338	664	H	35.9063	-5.56361	Verified		Ksar Sghir
90	KSR #10	2018-06-25	340	616	HF	35.9063	-5.56361	Verified		Ksar Sghir
91	KSR #11	2018-06-25	328	612	F	35.9063	-5.56361	Verified		Ksar Sghir
92	KSR #12	2018-06-25	335	536	HF	35.9063	-5.56361	Verified		Ksar Sghir
93	KSR #13	2018-06-25	325	518	F	35.9063	-5.56361	Verified		Ksar Sghir
94	KSR #14	2018-06-25	325	584	M	35.9063	-5.56361	Verified		Ksar Sghir
95	KSR #15	2018-06-25	377	864	M	35.9063	-5.56361	Verified		Ksar Sghir
96	TNG #1	2018-06-25	330	596	F	35.8854	-5.84347	Verified		Tanger
97	TNG #2	2018-06-25	335	604	M	35.8854	-5.84347	Verified		Tanger
98	TNG #3	2018-06-25	337	586	F	35.8854	-5.84347	Verified		Tanger
99	TNG #4	2018-06-25	325	582	F	35.8854	-5.84347	Verified		Tanger
100	TNG #5	2018-06-25	345	636	M	35.8854	-5.84347	Verified		Tanger
101	TNG #6	2018-06-25	378	792	F	35.8854	-5.84347	Verified		Tanger
102	TNG #7	2018-06-25	345	646	M	35.8854	-5.84347	Verified		Tanger
103	TNG #8	2018-06-25	355	692	M	35.8854	-5.84347	Verified		Tanger
104	TNG #9	2018-06-25	353	714	HF	35.8854	-5.84347	Verified		Tanger
105	TNG #10	2018-06-25	343	714	HF	35.8854	-5.84347	Verified		Tanger
106	TNG #11	2018-06-25	382	786	HF	35.8854	-5.84347	Verified		Tanger
107	TNG #12	2018-06-25	346	592	F	35.8854	-5.84347	Verified		Tanger
108	TNG #13	2018-06-25	320	528	HF	35.8854	-5.84347	Verified		Tanger
109	TNG #14	2018-06-25	326	504	M	35.8854	-5.84347	Verified		Tanger
110	TNG #15	2018-06-25	300	542	HF	35.8854	-5.84347	Verified		Tanger
111	TNG #16	2018-06-25	350	666	F	35.8854	-5.84347	Verified		Tanger
112	TNG #17	2018-06-25	375	780	F	35.8854	-5.84347	Verified		Tanger
113	TNG #18	2018-06-25	330	590	M	35.8854	-5.84347	Verified		Tanger
114	EDL #1	2018-10-22	239	194	IND	35.9431	-5.44603	Verified		Eddalya
115	EDL #2	2018-10-22	241	200	H	35.9431	-5.44603	Verified		Eddalya
116	EDL #3	2018-10-22	242	200	IND	35.9431	-5.44603	Verified		Eddalya
117	EDL #4	2018-10-22	246	200	H	35.9431	-5.44603	Verified		Eddalya
118	EDL #5	2018-10-22	247	226	IND	35.9431	-5.44603	Verified		Eddalya
119	EDL #6	2018-10-22	251	194	M	35.9431	-5.44603	Verified		Eddalya
120	EDL #7	2018-10-22	256	244	H	35.9431	-5.44603	Verified		Eddalya
121	EDL #8	2018-10-22	265	264	H	35.9431	-5.44603	Verified		Eddalya
122	EDL #9	2018-10-22	261	244	IND	35.9431	-5.44603	Verified		Eddalya
123	EDL #10	2018-10-22	254	236	M	35.9431	-5.44603	Verified		Eddalya
124	EDL #11	2018-10-22	280	322	F	35.9431	-5.44603	Verified		Eddalya
125	EDL #12	2018-10-22	285	332	M	35.9431	-5.44603	Verified		Eddalya
126	EDL #13	2018-10-22	274	298	H	35.9431	-5.44603	Verified		Eddalya
127	EDL #14	2018-10-22	281	312	H	35.9431	-5.44603	Verified		Eddalya
128	EDL #15	2018-10-22	291	320	H	35.9431	-5.44603	Verified		Eddalya
129	EDL #16	2018-10-22	299	376	H	35.9431	-5.44603	Verified		Eddalya
130	EDL #17	2018-10-22	292	366	H	35.9431	-5.44603	Verified		Eddalya
131	EDL #18	2018-10-22	290	362	H	35.9431	-5.44603	Verified		Eddalya
132	EDL #19	2018-10-22	302	374	H	35.9431	-5.44603	Verified		Eddalya
133	EDL #20	2018-10-22	295	376	H	35.9431	-5.44603	Verified		Eddalya
134	EDL #21	2018-10-22	305	398	M	35.9431	-5.44603	Verified		Eddalya
135	EDL #22	2018-10-22	302	450	H	35.9431	-5.44603	Verified		Eddalya
136	EDL #23	2018-10-22	312	440	H	35.9431	-5.44603	Verified		Eddalya
137	EDL #24	2018-10-22	344	564	M	35.9431	-5.44603	Verified		Eddalya
138	EDL #25	2018-10-22	277	214	H	35.9431	-5.44603	Verified		Eddalya
139	EDL #26	2018-10-22	248	204	M	35.9431	-5.44603	Verified		Eddalya
140	EDL #27	2018-10-22	240	188	H	35.9431	-5.44603	Verified		Eddalya
141	EDL #28	2018-10-22	250	202	M	35.9431	-5.44603	Verified		Eddalya
142	EDL #29	2018-10-22	255	236	H	35.9431	-5.44603	Verified		Eddalya
143	EDL #30	2018-10-22	290	330	H	35.9431	-5.44603	Verified		Eddalya
144	EDL #31	2018-10-22	301	366	H	35.9431	-5.44603	Verified		Eddalya
145	EDL #32	2018-10-22	310	430	H	35.9431	-5.44603	Verified		Eddalya
146	EDL #33	2018-10-22	340	514	F	35.9431	-5.44603	Verified		Eddalya
147	EDL #34	2018-10-22	327	530	H	35.9431	-5.44603	Verified		Eddalya
148	EDL #35	2018-10-22	412	1078	M	35.9431	-5.44603	Verified		Eddalya
149	SPA-18 #1	2018-04-28	271	280		36.2725	-5.0853	Verified	368	MEDITS 2018
150	SPA-18 #2	2018-05-03	280	321		36.5985	-3.6315	Verified	550	MEDITS 2018
151	SPA-18 #3	2018-05-06	297	364		36.5797	-2.5023	Verified	551	MEDITS 2018
152	SPA-18 #4	2018-05-07	289	288		36.486	-2.8952	Verified	627	MEDITS 2018
153	SPA-18 #5	2018-05-07	329	521		36.486	-2.8952	Verified	627	MEDITS 2018
154	SPA-18 #6	2018-05-07	322	460		36.486	-2.8952	Verified	627	MEDITS 2018
155	SPA-18 #7	2018-05-08	267	261		36.6538	-3.2533	Verified	662	MEDITS 2018
156	SPA-18 #8	2018-05-08	203	106		36.6832	-3.2555	Verified	374	MEDITS 2018
157	SPA-18 #9	2018-05-09	241	186		36.6288	-3.0608	Verified	358	MEDITS 2018
158	SPA-18 #10	2018-05-11	260	225		36.6455	-2.1035	Verified	423	MEDITS 2018
159	SPA-19 #1		280	332	M	36.503	-2.207	Verified	526	MEDITS 2019
160	SPA-19 #2	2019-05-11	239	193	M	36.577	-2.5108	Verified	542	MEDITS 2019
161	SPA-19 #3		229	178	M	36.3322	-4.8457	Verified	474	MEDITS 2019
162	SPA-19 #4		280	313	M	36.49	-4.197	Verified	535	MEDITS 2019
163	SPA-19 #5		254	220	M	35.9922	-3.0795	Verified	557	MEDITS 2019
164	SPA-19 #6		212	125		36.7008	-3.802	Verified	187	MEDITS 2019
165	SPA-19 #7	2019-06-10	180	77		36.6312	-3.0662	Verified	350	MEDITS 2019
166	SPA-19 #8	2019-06-10	191	94		36.6312	-3.0662	Verified	350	MEDITS 2019
167	SPA-19 #9	2019-05-13	181	82		37.1027	-1.7857	Verified	293	MEDITS 2019
168	SPA-19 #10	2019-05-13	203	106		37.1027	-1.7857	Verified	293	MEDITS 2019
169	SPA-19 #11		184	83		36.5438	-4.3665	Verified	251	MEDITS 2019
170	SPA-19 #12		194	86		36.5438	-4.3665	Verified	251	MEDITS 2019
171	SPA-19 #13		171	67		36.7053	-3.237	Verified	172	MEDITS 2019
172	SPA-19 #14		172	75		36.7053	-3.237	Verified	172	MEDITS 2019
173	SPA-19 #15		178	84		36.7053	-3.237	Verified	172	MEDITS 2019
174	SPA-19 #16		206	125		37.3175	-1.5627	Verified	352	MEDITS 2019
175	SPA-19 #17		180	80		36.6493	-2.431	Verified	325	MEDITS 2019
176	SPA-19 #18	2019-05-12	161	59		36.8087	-1.9203	Verified	219	MEDITS 2019
177	SPA-19 #19	2019-05-12	172	67		36.8087	-1.9203	Verified	219	MEDITS 2019
178	SPA-19 #20	2019-05-12	182	91		36.8087	-1.9203	Verified	219	MEDITS 2019
179	SPA-19 #21	2019-05-12	183	86		36.8087	-1.9203	Verified	219	MEDITS 2019
180	SPA-19 #22	2019-05-12	172	72		36.8087	-1.9203	Verified	219	MEDITS 2019
181	SPA-19 #23	2019-05-12	169	64		36.8087	-1.9203	Verified	219	MEDITS 2019
182	SPA-19 #24	2019-05-12	169	68		36.8087	-1.9203	Verified	219	MEDITS 2019
183	SPA-19 #25	2019-05-12	169	64		36.8087	-1.9203	Verified	219	MEDITS 2019
184	SPA-19 #26	2019-05-12	167	73		36.8087	-1.9203	Verified	219	MEDITS 2019
185	SPA-19 #27	2019-05-12	176	82		36.8087	-1.9203	Verified	219	MEDITS 2019
186	SPA-19 #28	2019-05-12	177	79		36.8087	-1.9203	Verified	219	MEDITS 2019
187	SPA-19 #29	2019-05-12	169	58		36.8087	-1.9203	Verified	219	MEDITS 2019
188	SPA-19 #30	2019-05-12	168	58		36.8087	-1.9203	Verified	219	MEDITS 2019
189	GHZ-#01	2018-06-21	199	110.4	F	35.2918	-1.88368	Not verified		Ghazaouet
190	GHZ-#02	2018-06-21	203	114	F	35.2918	-1.88368	Not verified		Ghazaouet
191	GHZ-#03	2018-06-21	202	112.1	F	35.2918	-1.88368	Not verified		Ghazaouet
192	GHZ-#04	2018-06-21	212	119.8	M	35.2918	-1.88368	Not verified		Ghazaouet
193	GHZ-#05	2018-06-21	197	94.2	F	35.2918	-1.88368	Not verified		Ghazaouet
194	GHZ-#06	2018-06-21	208	115.6	M	35.2918	-1.88368	Not verified		Ghazaouet
195	GHZ-#07	2018-06-21	196	104.1	F	35.2918	-1.88368	Not verified		Ghazaouet
196	GHZ-#08	2018-06-21	225	132.7	M	35.2918	-1.88368	Not verified		Ghazaouet
197	GHZ-#09	2018-06-21	223	138.6	F	35.2918	-1.88368	Not verified		Ghazaouet
198	ANB-#01	2018-07-10	246	199.4	F	37.0864	7.76638	Not verified		Annaba
199	ANB-#02	2018-07-10	267	231.5	F	37.0864	7.76638	Not verified		Annaba
200	ANB-#03	2018-07-10	240	182.8	F	37.0864	7.76638	Not verified		Annaba
201	ANB-#04	2018-07-10	211	129.1	F	37.0864	7.76638	Not verified		Annaba
202	ANB-#05	2018-07-10	189	84.9	IND	37.0864	7.76638	Not verified		Annaba
203	ANB-#06	2018-07-10	232	164.1	F	37.0864	7.76638	Not verified		Annaba
204	ANB-#07	2018-07-10	272	262.2	F	37.0864	7.76638	Not verified		Annaba
205	ANB-#08	2018-07-10	281	289.4	F	37.0864	7.76638	Not verified		Annaba
206	ANB-#09	2018-07-10	264	254	F	37.0864	7.76638	Not verified		Annaba
207	ANB-#10	2018-07-10	249	189.4	M	37.0864	7.76638	Not verified		Annaba
208	ANB-#11	2018-07-10	281	288.6	M	37.0864	7.76638	Not verified		Annaba
209	ANB-#12	2018-07-10	279	312.8	F	37.0864	7.76638	Not verified		Annaba
210	ANB-#13	2018-07-10	248	205.5	M	37.0864	7.76638	Not verified		Annaba
211	ANB-#14	2018-07-10	270	290.4	F	37.0864	7.76638	Not verified		Annaba
212	ANB-#15	2018-07-10	283	295.3	M	37.0864	7.76638	Not verified		Annaba
213	ANB-#16	2018-07-10	288	305.5	F	37.0864	7.76638	Not verified		Annaba
214	ANB-#17	2018-07-10	292	289.7	F	37.0864	7.76638	Not verified		Annaba
215	ANB-#18	2018-07-10	271	259.2	M	37.0864	7.76638	Not verified		Annaba
216	ANB-#19	2018-07-10	238	175	F	37.0864	7.76638	Not verified		Annaba
217	ANB-#20	2018-07-10	236	192.1	F	37.0864	7.76638	Not verified		Annaba
218	ANB-#21	2018-07-10	249	208.4	F	37.0864	7.76638	Not verified		Annaba
219	ANB-#22	2018-07-10	236	171.5	F	37.0864	7.76638	Not verified		Annaba
220	ANB-#23	2018-07-10	238	179.1	M	37.0864	7.76638	Not verified		Annaba
221	ANB-#24	2018-07-10	243	190.6	M	37.0864	7.76638	Not verified		Annaba
222	ANB-#25	2018-07-10	260	216.2	F	37.0864	7.76638	Not verified		Annaba
223	ANB-#26	2018-07-10	253	201.4	F	37.0864	7.76638	Not verified		Annaba
224	ANB-#27	2018-07-10	218	145.9	M	37.0864	7.76638	Not verified		Annaba
225	ANB-#28	2018-07-10	268	262	F	37.0864	7.76638	Not verified		Annaba
226	ANB-#29	2018-07-10	249	212.5	F	37.0864	7.76638	Not verified		Annaba
227	ANB-#30	2018-07-10	230	158.6	F	37.0864	7.76638	Not verified		Annaba
228	TBK-#1	2018-12-30	314	654.12	F	37.1704	8.74592	Not verified		Tabarka
229	TBK-#2	2018-12-30	342	836.35	M	37.1704	8.74592	Not verified		Tabarka
230	TBK-#3	2018-12-30	326	651.25	F	37.1704	8.74592	Not verified		Tabarka
231	TBK-#4	2018-12-30	349	809.33	F	37.1704	8.74592	Not verified		Tabarka
232	TBK-#5	2018-12-30	339	760.73	M	37.1704	8.74592	Not verified		Tabarka
233	TBK-#6	2018-12-30	310	635.59	M	37.1704	8.74592	Not verified		Tabarka
234	TBK-#7	2018-12-30	309	597.36	M	37.1704	8.74592	Not verified		Tabarka
235	TBK-#8	2018-12-30	317	686.49	F	37.1704	8.74592	Not verified		Tabarka
236	TBK-#9	2018-12-30	327	660.55	M	37.1704	8.74592	Not verified		Tabarka
237	TBK-#10	2018-12-30	341	793.47	F	37.1704	8.74592	Not verified		Tabarka
238	TBK-#11	2018-12-30	321	724.33	F	37.1704	8.74592	Not verified		Tabarka
239	TBK-#12	2018-12-30	345	795.83	M	37.1704	8.74592	Not verified		Tabarka
240	TBK-#13	2018-12-30	345	818.77	F	37.1704	8.74592	Not verified		Tabarka
241	TBK-#14	2018-12-30	332	689.09	M	37.1704	8.74592	Not verified		Tabarka
242	TBK-#15	2018-12-30	327	698.77	M	37.1704	8.74592	Not verified		Tabarka
243	TBK-#16	2018-12-30	324	670.45	M	37.1704	8.74592	Not verified		Tabarka
244	TBK-#17	2018-12-30	337	768.14	F	37.1704	8.74592	Not verified		Tabarka
245	TBK-#18	2018-12-30	348	868.74	F	37.1704	8.74592	Not verified		Tabarka
246	TBK-#19	2018-12-30	345	784.49	F	37.1704	8.74592	Not verified		Tabarka
247	TBK-#20	2018-12-30	347	815.15	M	37.1704	8.74592	Not verified		Tabarka
248	TBK-#21	2018-12-30	350	842.46	F	37.1704	8.74592	Not verified		Tabarka
249	TBK-#22	2018-12-30	345	767.64	M	37.1704	8.74592	Not verified		Tabarka
250	TBK-#23	2018-12-30	334	711.55	F	37.1704	8.74592	Not verified		Tabarka
251	TBK-#24	2018-12-30	302	596.74	F	37.1704	8.74592	Not verified		Tabarka
252	TBK-#25	2018-12-30	345	838.93	F	37.1704	8.74592	Not verified		Tabarka
253	TBK-#26	2018-12-30	342	784.12	F	37.1704	8.74592	Not verified		Tabarka
254	TBK-#27	2018-12-30	355	912.74	F	37.1704	8.74592	Not verified		Tabarka
255	TBK-#28	2018-12-30	352	924.29	F	37.1704	8.74592	Not verified		Tabarka
256	TBK-#29	2018-12-30	344	782.7	F	37.1704	8.74592	Not verified		Tabarka
257	TBK-#30	2018-12-30	355	869.46	F	37.1704	8.74592	Not verified		Tabarka
258	MZR #1		361	776.28	M	38,0230	12,4871	Not verified		Marettimo
259	MZR #2		405	947.6	F	38,0231	12,4872	Not verified		Marettimo
260	MZR #3		330	506.1	F	38,0232	12,4873	Not verified		Marettimo
261	MZR #4		390	853.45	F	38,0233	12,4874	Not verified		Marettimo
262	MZR #5		370	870.7	F	38,0234	12,4875	Not verified		Marettimo
263	MZR #6		355	657.96	M	38,0235	12,4876	Not verified		Marettimo
264	MZR #7	2019-03-28	285	276.2	M	38,0236	12,4877	Not verified		Marettimo
265	MZR #8	2019-03-28	260	229.8	M	38,0237	12,4878	Not verified		Marettimo
266	MZR #9	2019-03-28	245	203.6	M	38,0238	12,4879	Not verified		Marettimo
267	MZR #10	2019-03-28	235	194.4	M	38,0239	12,4880	Not verified		Marettimo
268	MZR #11	2019-03-28	245	216.7	M	38,0240	12,4881	Not verified		Marettimo
269	MZR #12	2019-03-28	245	193.9	M	38,0241	12,4882	Not verified		Marettimo
270	MZR #13	2019-03-28	235	188.1	M	38,0242	12,4883	Not verified		Marettimo
271	MZR #14	2019-03-28	225	150.6	M	38,0243	12,4884	Not verified		Marettimo
272	MZR #15	2019-03-28	220	135.4	M	38,0244	12,4885	Not verified		Marettimo
273	MZR #16	2019-03-28	210	116.3	M	38,0245	12,4886	Not verified		Marettimo
274	MLT#01	2018-09-13	410	1026.8	H	35.8263	14.6344	Not verified		Malta
275	MLT#02	2018-09-13	365	766.3	H	35.8263	14.6344	Not verified		Malta
276	MLT#03	2018-09-13	385	797.7	H	35.8263	14.6344	Not verified		Malta
277	MLT#04	2018-09-13	325	508.5	F	35.8263	14.6344	Not verified		Malta
278	MLT#05	2019-03-12	330	520.7	M	35.6865	14.3549	Not verified		Malta
279	MLT#06	2019-03-12	325	486.7	M	35.6865	14.3549	Not verified		Malta
280	MLT#07	2019-03-12	380	899.1	F	35.6865	14.3549	Not verified		Malta
281	MLT#08	2019-03-12	360	635.5	F	35.6865	14.3549	Not verified		Malta
282	MLT#09	2019-03-12	340	603.7	F	35.6865	14.3549	Not verified		Malta
283	MLT#10	2019-03-12	350	638.2	M	35.6865	14.3549	Not verified		Malta
284	MLT#11	2019-03-12	360	646.5	M	35.6865	14.3549	Not verified		Malta
285	MLT#12	2019-03-12	355	681.1	F	35.6865	14.3549	Not verified		Malta
286	MLT#13	2019-03-12	330	494.9	F	35.6865	14.3549	Not verified		Malta
287	MLT#14	2019-03-12	350	632.6	F	35.6865	14.3549	Not verified		Malta
288	MLT#15	2019-03-12	320	472.2	F	35.6865	14.3549	Not verified		Malta
289	MLT#16	2019-03-12	315	446	M	35.6865	14.3549	Not verified		Malta
290	MLT#17	2019-03-12	320	470.6	F	35.6865	14.3549	Not verified		Malta
291	ION#1	2018-08-18	236	197.4	F	37.3602	20.5178	Verified	590	Ionion Sea
292	ION#2	2018-08-18	221	144.5	F	37.3602	20.5178	Verified	590	Ionion Sea
293	ION#3	2018-08-18	225	146	F	37.3602	20.5178	Verified	590	Ionion Sea
294	ION#4	2018-08-18	229	177.5	F	37.3602	20.5178	Verified	590	Ionion Sea
295	ION#5	2018-08-18	206	123.7	M	37.3602	20.5178	Verified	590	Ionion Sea
296	ION#6	2018-08-18	211	117.9	M	37.3602	20.5178	Verified	590	Ionion Sea
297	ION#7	2018-08-18	234	188.5	F	37.3602	20.5178	Verified	590	Ionion Sea
298	ION#8	2018-08-18	230	171.6	F	37.3602	20.5178	Verified	590	Ionion Sea
299	ION#9	2018-08-18	206	126.4	M	37.3602	20.5178	Verified	590	Ionion Sea
300	ION#10	2018-08-18	216	147.1	F	37.3602	20.5178	Verified	590	Ionion Sea
301	ION#11	2018-08-18	210	123.3	M	37.3602	20.5178	Verified	590	Ionion Sea
302	ION#12	2018-08-18	241	198.4	F	37.3602	20.5178	Verified	590	Ionion Sea
303	ION#13	2018-08-18	215	138.6	M	37.3602	20.5178	Verified	590	Ionion Sea
304	ION#14	2018-08-18	243	194.5	F	37.3602	20.5178	Verified	590	Ionion Sea
305	ION#15	2018-08-18	195	99.4	M	37.3602	20.5178	Verified	590	Ionion Sea
306	ION#16	2018-08-18	182	77.8	M	37.3602	20.5178	Verified	590	Ionion Sea
307	ION#17	2018-08-18	223	155.5	M	37.3602	20.5178	Verified	590	Ionion Sea
308	ION#18	2018-08-18	256	115.3	F	37.3602	20.5178	Verified	590	Ionion Sea
309	ION#19	2018-08-17	220	144.5	F	37.5419	20.5675	Verified	533	Ionion Sea
310	ION#20	2018-08-17	206	122.9	M	37.5419	20.5675	Verified	533	Ionion Sea
311	ION#21	2018-08-17	237	205.6	F	37.5419	20.5675	Verified	533	Ionion Sea
312	ION#22	2018-08-17	227	137.7	M	37.5419	20.5675	Verified	533	Ionion Sea
313	ION#23	2018-08-17	205	139.6	M	37.5419	20.5675	Verified	533	Ionion Sea
314	ION#24	2018-08-17	212	151.2	F	37.5419	20.5675	Verified	533	Ionion Sea
315	ION#25	2018-08-17	200	118.7	M	37.5419	20.5675	Verified	533	Ionion Sea
316	ION#26	2018-08-17	227	189.2	F	37.5419	20.5675	Verified	533	Ionion Sea
317	ION#27	2018-08-17	202	113.4	M	37.5419	20.5675	Verified	533	Ionion Sea
318	ION#28	2018-08-17	215	136.8	M	37.5419	20.5675	Verified	533	Ionion Sea
319	ION#29	2018-08-17	212	126.3	M	37.5419	20.5675	Verified	533	Ionion Sea
320	ION#30	2018-08-17	195	107.6	M	37.5419	20.5675	Verified	533	Ionion Sea
