# Supplementary material for: Matching an Old Marine Paradigm: Limitless Connectivity in a Deep-Water Fish over a Large Distance
Source: Animals (Basel). 2023 Aug 23;13(17):2691. doi: 10.3390/ani13172691 (PMC10486518; doi:10.3390/ani13172691)
Supplement: Supplementary file 1 [file animals-13-02691-s001.zip › Table S2.xlsx]

## Sheet: Table S2
Locus	Expected allelic range	Repeat	Reference
MIX A
Pb-OVI-B2	75–125	(TC)31	Piñera et al. [37,45]
PbMS 2	98–152	(CTT)6CTC(CTT)3	Stockley et al. [44]
PbMS 6	103–169	(CA)43	Stockley et al. [44]
PbMS 16	105–225	(CA)33	Stockley et al. [44]
PbMS 19	168–186	(CAG)10	Stockley et al. [44]
Pb-OVI-D108	290–302	(AGAT)8	Piñera et al. [37,45]
MIX B
Pb-OVI-A5	109–221	(AC)15	Piñera et al. [37,45]
Pb-OVI-D114	119–155	(TAGA)9	Piñera et al. [37,45]
Pb-OVI-D102	127–219	(TCTA)21	Piñera et al. [37,45]
Pb-OVI-D20	153–189	(ATAG)14	Piñera et al. [37,45]
Pb-OVI-D21	240–276	(ATCT)15	Piñera et al. [37,45]
Pb-OVI-D106	291–319	(AGAT)10	Piñera et al. [37,45]
MIX C
Pb-OVI-A3	99–127	(GC)10(AC)15	Piñera et al. [37,45]
PbMS 20	154–184	(GTGC)3(GT)11	Piñera et al. [37,45]
PbMS 18	165–221	(CA)10	Piñera et al. [37,45]
PbMS 1	176–268	(CA)34	Stockley et al. [44]
Pb-OVI-D22	220–268	(TCTA)14	Piñera et al. [37,45]
MIX D
PbMS 17	162–172	(GA)5	Stockley et al. [44]
PbMS 4	170–224	(CA)4T(CA)22	Stockley et al. [44]
PbMS 15	174–226	(CA)24GAG(TC)3	Stockley et al. [44]
Pb-OVI-C103	177–204	(TGA)8	Piñera et al. [37,45]
Pb-OVI-D101	228–296	(TCTA)19	Piñera et al. [37,45]
MIX E
AY188339	92-144	(TG)10	Ramšak et al. [46]
AY188340	312-512	(ATGG)2ATTG(ATGG)12(GATA)26	Ramšak et al. [46]
AY188341	135-183	(CA)9	Ramšak et al. [46]
AY188342	134-232	(CA)21	Ramšak et al. [46]
MIX F
AY188343	126-195	(CA)11	Ramšak et al. [46]
AY188344	199-215	(TG)10N13(TG)8	Ramšak et al. [46]
AY188346	108-176	(GT)18CT(GT)6	Ramšak et al. [46]
