# Supplementary material for: Matching an Old Marine Paradigm: Limitless Connectivity in a Deep-Water Fish over a Large Distance
Source: Animals (Basel). 2023 Aug 23;13(17):2691. doi: 10.3390/ani13172691 (PMC10486518; doi:10.3390/ani13172691)
Supplement: Supplementary file 1 [file animals-13-02691-s001.zip › Table S3.xlsx]

## Sheet: Table S3
Pop	N. of individuals	Hexp	Hobs	Mean N. allele	Mean AR	FIS	HWE
STD	26	0.833	0.701	14.25	8327	0.178	< 7.92e-23
POR	35	0.850	0.730	14.90	8367	0.156	< 7.82e-18
COL	18	0.827	0.720	11.55	8082	0.157	< 3.73e-15
KSR	13	0.802	0.623	10.00	7984	0.263	< 2.27e-14
TNG	15	0.816	0.686	10.80	7953	0.193	< 3.07e-18
EDL	35	0.852	0.710	15.10	8355	0.181	< 3.76e-22
SPA-18	10	0.800	0.733	9.15	8205	0.137	< 3.01e-06
SPA-19	30	0.863	0.703	15.80	8872	0.202	< 4.20e-26
GHZ	9	0.817	0.731	8.70	8216	0.164	< 2.78e-12
ANB	30	0.846	0.731	14.70	8370	0.152	< 2.91e-16
TBK	28	0.851	0.726	14.20	8385	0.165	< 1.93e-21
MZR	16	0.812	0.702	10.20	8079	0.173	< 2.43e-12
MLT	14	0.825	0.751	11.35	8189	0.122	< 2.00e-10
ION	30	0.848	0.750	14.30	8411	0.133	< 2.08e-13
