# Supplementary material for: Matching an Old Marine Paradigm: Limitless Connectivity in a Deep-Water Fish over a Large Distance
Source: Animals (Basel). 2023 Aug 23;13(17):2691. doi: 10.3390/ani13172691 (PMC10486518; doi:10.3390/ani13172691)
Supplement: Supplementary file 1 [file animals-13-02691-s001.zip › Table S4.xlsx]

## Sheet: Table S4
	20 loci		14 loci
FST	Chi-square	Fisher	Chi-square	Fisher
0.001	0.644	0.577	0.524	0.464
0.0025	0.998	0.997	0.966	0.937
0.005	1000	1000	1000	1000
0.010	1000	1000	1000	1000
0.02	1000	1000	1000	1000
