# Supplementary material for: Matching an Old Marine Paradigm: Limitless Connectivity in a Deep-Water Fish over a Large Distance
Source: Animals (Basel). 2023 Aug 23;13(17):2691. doi: 10.3390/ani13172691 (PMC10486518; doi:10.3390/ani13172691)
Supplement: Supplementary file 1 [file animals-13-02691-s001.zip › Table S5.xlsx]

## Sheet: Table S5
Population	Mean N	Mean k	Mean He	p_W_1t_TPM	p_W_2t_TPM
STD	50.9	13.9	0.839	0.500	1000
POR	69.6	14.9	0.852	0.097	0.194
COL	35.9	11.2	0.830	0.148	0.296
KSR	25.1	9.7	0.834	0.068	0.135
TNG	29.9	10.4	0.829	0.134	0.268
EDL	69.6	15.2	0.850	0.029	0.058
SPA-18	19.9	9.1	0.829	0.121	0.241
SPA-19	58.6	15.6	0.860	0.749	0.542
GHZ	18.0	8.8	0.850	0.163	0.326
ANB	59.4	13.6	0.837	0.524	1000
TBK	55.0	13.4	0.855	0.213	0.426
MZR	27.6	10.6	0.840	0.452	0.903
MLT	31.4	11.0	0.844	0.163	0.326
ION	58.6	14.5	0.848	0.548	0.952
